# Supplementary material for: AI Innovation, Green Learning, and Sustainable Attitudes: Pathways to Green Technology Adoption in Universities
Source: Research Square preprint supplement (doi:10.21203/rs.3.rs-7685621/v1), 2025-11-18
Supplement: Supplementary file 1 [file 9de235fa2f264143ab9a21f9.xlsx]

## Sheet: Data Art
Gender	Age	Level_of_study	Specialization	AIGT1	AIGT2	AIGT3	AIGT4	AIGT5	GC1	GC2	GC3	GC4	GC5	SA1	SA2	SA3	SA4	SA5	GDLO1	GDLO2	GDLO3	GDLO4	GDLO5	CAI1	CAI2	CAI3	CAI4	CAI5	RAI1	RAI2	RAI3	RAI4	RAI5	AGT1	AGT2	AGT3	AGT4	AGT5	GTU1	GTU2	GTU3	GTU4	GTU5
2	5	2	3	3	4	3	4	4	4	5	5	5	4	3	3	4	4	3	4	4	3	3	3	4	3	3	4	4	3	3	3	3	3	3	4	4	4	3	4	3	3	4	4
2	2	2	2	3	3	4	2	5	4	3	3	2	2	1	3	3	3	2	3	2	2	1	3	2	4	4	3	5	5	4	5	5	5	5	5	4	5	5	4	5	5	5	5
2	2	2	2	4	4	4	4	4	4	4	4	4	4	4	4	4	4	4	4	4	4	4	4	4	4	4	4	4	4	4	4	4	4	4	4	4	4	4	4	4	4	4	4
1	1	1	3	4	4	4	5	3	4	3	4	5	3	5	5	4	3	4	3	5	4	5	3	4	4	5	2	3	3	5	4	5	4	4	3	5	4	5	4	3	3	5	5
1	1	1	3	4	4	3	3	4	4	2	2	2	3	2	4	3	4	4	3	2	2	1	2	3	3	2	2	4	4	4	3	3	3	4	3	3	3	3	2	3	3	3	3
2	5	1	3	3	4	4	4	5	5	5	3	5	4	2	3	3	3	3	5	5	5	5	5	5	5	4	4	4	4	4	4	4	4	5	5	5	5	3	2	4	4	5	5
2	1	1	1	5	4	5	3	5	5	4	4	2	4	3	5	5	5	5	4	5	5	5	4	4	4	5	5	5	5	5	5	5	5	5	5	5	3	5	5	5	3	5	5
1	2	1	2	4	4	4	3	3	4	2	4	5	5	3	3	2	2	4	4	4	3	4	4	4	4	4	3	4	5	4	4	3	3	5	4	3	4	3	4	3	2	5	4
1	2	1	3	4	4	3	4	4	4	4	4	5	5	5	3	3	3	3	4	4	4	4	4	4	4	4	4	4	4	4	4	4	4	3	3	3	3	3	3	2	2	2	2
2	2	2	3	3	3	4	4	4	4	3	3	4	2	2	2	2	2	3	3	2	2	3	3	3	3	3	2	4	4	4	3	3	3	4	3	4	4	4	3	4	3	4	4
1	1	1	3	4	5	3	3	5	5	5	4	3	4	4	5	5	5	5	4	4	4	3	5	4	3	5	5	4	5	4	5	5	5	5	5	3	2	3	3	4	3	5	4
1	2	1	2	3	4	4	4	5	4	3	3	4	4	5	4	4	5	4	5	4	4	3	4	3	4	3	5	5	5	4	4	4	3	4	4	5	4	5	3	4	4	4	5
1	1	1	2	3	3	5	4	4	4	4	3	3	4	2	4	4	4	4	4	3	4	4	4	4	3	3	4	3	3	3	3	2	3	4	4	5	4	4	4	4	2	4	3
1	1	1	3	5	5	5	5	5	5	5	5	5	5	5	5	5	5	4	4	4	4	4	4	4	4	4	4	4	5	5	5	5	5	5	5	5	5	5	5	5	5	2	2
1	3	2	2	4	4	3	4	3	4	5	4	3	4	4	4	3	3	4	4	4	3	4	5	4	3	3	3	4	3	3	4	4	4	4	2	4	3	4	3	4	3	3	4
2	2	1	2	2	2	5	3	2	5	4	4	4	2	2	4	2	2	2	2	4	2	2	2	2	2	2	2	2	4	4	2	4	2	2	4	4	4	4	4	2	2	2	2
1	3	2	2	3	4	3	4	4	4	5	2	3	4	4	3	4	4	4	3	4	4	4	3	2	2	2	2	3	2	4	3	4	3	3	4	5	2	2	2	2	2	2	2
2	1	1	2	1	1	2	2	3	2	2	2	3	3	2	3	2	2	2	4	5	5	4	4	4	4	4	4	5	4	4	4	4	4	2	3	4	4	2	3	4	4	4	3
2	4	2	1	2	2	4	1	3	4	3	2	2	3	2	3	4	5	5	2	2	2	2	3	2	2	4	4	5	4	4	2	2	4	4	3	2	2	3	3	3	4	4	3
1	4	2	3	5	5	4	4	3	3	3	3	5	4	3	3	3	3	2	4	4	3	3	3	3	3	5	3	3	2	3	3	4	4	3	4	5	3	3	2	3	4	5	3
1	1	1	2	4	3	5	5	4	4	4	3	4	4	4	5	4	5	4	5	5	4	5	5	5	4	5	4	5	5	4	5	4	5	5	5	5	4	5	5	5	4	4	5
1	1	1	1	3	4	3	2	4	3	3	3	3	3	2	2	2	4	3	3	2	5	5	4	5	3	4	5	4	3	3	3	5	2	4	3	4	4	2	4	4	3	3	2
2	4	2	1	3	3	3	2	4	3	3	2	2	4	2	5	4	4	4	4	2	4	2	4	4	4	3	4	3	3	3	3	3	4	3	3	3	3	3	3	3	2	4	4
2	2	1	1	3	4	4	3	4	4	3	3	5	4	3	4	3	3	4	4	4	4	4	4	3	3	2	4	4	4	4	4	4	4	4	3	3	5	3	4	3	3	4	4
1	5	2	2	5	5	5	5	4	4	3	4	4	4	4	2	4	3	3	4	4	4	4	4	4	4	4	4	3	3	4	3	3	3	4	5	3	4	4	3	4	4	4	4
1	3	2	2	5	4	4	5	4	4	4	5	4	3	4	4	4	4	4	4	4	4	5	4	4	4	4	4	5	4	4	5	4	4	4	4	5	4	4	3	4	4	4	4
2	2	1	1	4	4	4	4	5	5	3	2	3	3	4	4	5	4	5	5	5	5	4	4	4	3	3	3	5	5	5	5	5	5	4	3	5	5	3	2	5	5	5	5
2	2	1	2	3	3	3	3	3	4	4	3	3	3	3	3	3	3	4	3	3	2	2	2	3	3	3	3	4	4	4	4	4	4	3	3	3	3	3	3	3	3	4	4
2	2	1	1	3	4	4	3	4	4	4	4	3	3	3	4	4	4	4	4	4	4	3	3	3	3	2	3	4	4	4	4	4	4	4	3	4	4	3	4	3	3	4	4
1	5	2	1	5	5	5	5	5	5	5	5	4	4	4	5	4	4	4	5	5	4	4	5	4	5	4	5	5	4	5	4	4	5	5	4	5	4	5	5	5	4	5	4
2	1	1	1	4	4	4	3	4	4	4	4	3	3	3	4	4	4	4	3	3	3	3	4	4	3	4	3	3	3	3	3	3	3	4	4	4	4	4	4	4	3	4	4
2	1	1	2	4	4	5	4	3	3	2	3	4	5	4	5	5	5	4	4	5	5	5	4	4	4	4	5	5	5	5	5	5	5	5	5	5	3	4	3	4	4	5	4
2	4	2	1	3	3	3	2	3	4	4	3	3	3	1	2	2	2	2	2	2	2	2	2	3	2	3	3	4	4	4	3	3	3	3	4	3	4	2	4	4	4	4	4
2	1	1	3	4	5	4	5	4	4	4	2	2	2	3	4	4	3	2	4	3	3	3	3	2	3	2	2	4	4	4	2	3	3	4	4	4	4	4	4	2	2	4	4
2	1	1	3	4	4	4	5	3	3	3	4	3	3	4	5	5	5	3	4	4	4	4	4	4	4	4	4	3	3	4	4	4	4	4	3	4	3	2	2	4	4	4	4
2	2	2	1	4	4	4	4	5	5	5	4	4	4	2	4	4	4	4	4	4	4	4	4	4	4	2	4	4	4	4	4	4	4	4	4	4	4	4	4	3	2	4	4
2	1	1	3	3	3	4	4	5	5	5	5	5	5	3	2	2	4	4	4	4	4	4	4	4	4	3	4	4	4	4	4	4	4	5	4	4	5	3	3	4	5	5	5
2	2	1	3	3	3	2	1	3	3	1	2	2	2	2	4	4	5	2	3	2	2	2	2	2	3	2	2	4	4	4	3	3	3	4	3	3	4	4	4	2	3	4	4
2	2	1	1	4	4	4	4	5	4	4	4	3	3	3	4	4	4	4	3	3	3	3	3	3	3	3	3	3	4	3	3	3	3	3	3	3	3	3	5	5	5	4	3
2	5	2	3	4	3	3	3	3	3	3	3	2	4	3	3	3	3	3	5	3	3	3	3	3	3	4	3	3	3	3	3	3	3	3	3	3	4	4	3	3	3	3	3
2	2	1	1	4	4	4	2	3	3	3	2	2	2	2	4	4	4	3	2	4	4	2	2	4	4	4	3	5	5	5	5	5	5	4	3	4	4	4	4	4	4	5	5
2	2	1	1	3	4	3	3	3	3	2	3	2	3	4	3	2	3	2	3	4	2	3	3	2	3	2	3	3	3	3	2	3	3	3	3	3	3	3	2	3	3	3	3
2	2	1	1	4	4	4	4	4	4	3	3	4	4	3	4	4	4	4	4	4	4	4	4	3	4	4	4	4	4	4	4	4	4	4	4	4	4	4	4	4	4	4	4
2	2	1	1	4	5	5	4	4	4	3	4	5	5	3	4	4	4	4	4	4	4	4	4	4	4	4	4	5	5	5	5	5	5	4	4	4	4	4	4	4	4	4	4
2	2	1	1	3	4	4	3	4	4	3	3	2	3	2	4	3	3	3	3	3	3	4	4	3	3	4	3	4	4	3	3	3	4	4	3	3	3	3	3	2	3	4	4
2	1	1	3	4	4	4	4	4	4	4	4	3	3	3	3	3	3	5	3	3	3	3	3	3	3	4	4	4	4	4	3	3	3	4	3	3	3	2	2	3	3	4	4
2	1	1	3	3	3	3	3	3	3	3	3	3	3	3	3	3	3	3	3	3	3	3	3	3	3	3	3	3	3	3	3	3	3	3	3	3	3	3	3	3	3	3	3
2	1	1	3	2	1	1	1	3	1	1	1	1	1	1	1	3	2	2	1	2	1	1	2	1	1	1	1	1	1	1	1	1	1	1	2	1	2	1	1	3	5	2	3
2	2	2	1	4	4	4	3	4	4	4	4	2	2	2	3	3	4	2	3	4	3	3	3	4	3	3	3	3	3	3	3	3	3	4	3	3	3	3	3	3	3	3	3
2	1	1	1	4	4	3	3	3	3	4	3	4	3	4	4	4	4	3	3	4	3	3	3	4	3	3	3	4	4	4	3	3	3	3	4	2	3	3	2	3	4	4	4
2	2	1	1	4	3	4	3	4	3	3	4	5	5	3	4	4	4	4	4	3	3	3	3	5	4	5	5	5	4	3	5	5	5	5	4	4	5	4	4	4	3	3	4
2	2	1	1	3	3	3	4	4	4	4	4	3	3	4	5	5	4	4	3	4	4	4	4	5	4	4	3	5	5	5	3	3	3	3	3	5	4	3	4	5	5	3	3
2	4	2	2	3	3	4	4	3	3	4	4	4	4	4	4	4	4	3	4	4	4	4	4	3	4	3	4	4	4	4	4	4	4	4	4	4	3	3	4	3	4	4	4
1	3	2	1	4	2	2	2	2	4	4	2	4	4	2	4	4	4	4	3	3	4	4	4	4	4	4	4	4	4	4	4	4	4	4	4	4	4	4	4	4	4	4	4
2	1	1	1	2	2	2	2	5	4	3	2	4	2	1	3	4	4	4	3	1	3	3	3	4	3	2	2	4	4	4	3	4	3	4	2	3	4	3	4	3	4	4	4
2	3	2	2	4	4	4	4	3	4	4	4	4	5	2	4	4	4	4	2	2	2	3	3	4	4	3	3	4	4	4	4	4	4	4	4	3	3	4	4	4	4	4	5
1	2	1	2	4	3	3	4	3	4	3	4	3	3	3	3	2	3	3	3	4	4	3	3	3	3	4	4	3	4	3	4	4	4	3	3	2	3	3	3	3	4	3	4
1	2	1	2	4	4	4	4	4	3	4	3	3	3	2	4	4	4	4	2	2	2	2	3	4	4	3	3	4	4	4	4	4	4	4	4	4	3	4	4	4	4	4	5
1	1	1	2	5	5	5	5	5	5	5	5	4	5	4	3	5	4	5	4	4	5	5	4	3	4	3	5	5	4	4	5	3	4	3	3	5	5	5	5	4	3	2	4
1	1	1	2	2	1	3	4	5	2	3	4	3	1	5	2	4	4	3	2	4	3	4	4	2	2	1	3	2	3	5	2	4	2	2	2	4	5	4	2	2	4	2	1
1	3	1	1	4	4	4	3	4	3	3	3	3	3	2	2	3	2	3	3	2	2	2	4	2	3	3	2	3	3	4	3	2	3	2	1	3	4	5	4	4	2	3	4
1	2	1	3	3	4	4	3	4	4	4	4	4	3	4	3	4	4	4	3	3	5	4	4	4	4	5	3	3	4	3	4	4	3	3	5	5	4	4	3	4	4	4	5
1	2	1	3	5	5	5	5	4	5	5	5	5	3	5	5	4	5	5	5	4	4	4	4	5	5	5	5	5	5	5	5	5	5	5	5	5	5	4	4	4	5	4	5
2	2	1	2	3	3	3	2	4	5	5	4	2	2	2	3	4	4	4	3	2	2	2	3	3	2	2	2	4	4	4	3	2	2	2	2	2	2	2	3	3	3	4	4
1	4	2	1	3	2	3	2	3	2	3	2	3	2	2	4	2	4	3	3	3	3	4	4	3	4	3	3	3	2	3	3	3	3	4	4	2	2	2	3	3	3	4	4
2	2	2	1	3	4	4	5	5	4	4	4	5	4	3	5	5	3	4	5	5	5	5	4	5	5	4	4	4	4	5	5	5	5	5	5	3	5	3	4	5	1	5	5
1	1	1	1	4	4	4	3	3	3	4	4	4	3	2	4	4	3	2	4	2	3	3	3	4	3	3	4	4	5	5	4	4	4	3	4	3	4	3	3	4	3	4	5
1	1	1	1	5	5	5	5	5	5	4	5	4	4	3	4	4	3	2	5	4	4	5	5	4	4	5	5	3	3	3	5	5	4	5	4	5	5	4	3	3	3	5	5
2	1	1	1	4	5	4	4	4	4	5	3	3	4	4	2	2	3	3	4	3	4	3	2	4	5	2	2	3	4	4	4	4	4	4	4	5	3	4	5	3	3	5	3
2	3	1	1	3	3	3	4	5	5	5	5	4	4	4	4	4	4	4	4	4	4	4	4	4	4	4	4	5	5	5	5	5	5	5	5	5	5	5	5	5	5	5	5
2	1	1	1	5	5	5	5	5	5	4	4	5	5	2	5	5	5	5	5	5	5	5	4	5	5	2	5	5	5	5	5	5	5	5	5	5	5	5	5	5	5	5	5
1	1	1	2	4	4	4	4	4	4	4	3	3	3	3	4	4	4	4	4	4	4	4	3	4	3	4	4	4	4	4	3	3	3	4	4	4	4	4	4	3	3	3	4
1	2	1	2	4	3	4	4	3	4	4	4	3	5	5	4	2	2	3	4	4	4	3	4	4	4	3	3	4	3	3	5	4	3	3	4	4	5	4	3	4	3	5	4
1	3	2	1	3	3	4	2	4	3	4	4	1	4	1	1	1	3	1	2	2	1	3	2	3	1	4	3	2	2	3	3	3	3	4	4	3	4	2	1	4	3	2	4
2	1	1	1	3	4	3	4	5	3	2	3	5	3	4	2	2	5	4	4	5	5	4	4	4	4	3	4	3	2	4	3	3	3	3	4	2	5	2	3	2	4	5	5
1	1	1	2	5	4	4	5	5	5	5	3	4	5	3	4	4	4	3	5	4	5	4	5	3	3	3	3	3	3	3	3	3	3	4	5	4	5	4	4	5	3	5	5
2	3	2	1	4	4	4	3	2	3	3	3	2	2	2	4	4	4	3	3	3	2	2	4	2	4	3	4	4	4	3	3	2	3	4	3	3	4	2	2	2	3	4	4
2	4	2	2	5	5	5	5	4	5	5	5	4	5	5	5	5	5	5	5	5	5	5	5	5	5	5	5	5	5	5	5	5	5	5	5	5	5	5	5	5	4	5	5
2	2	1	2	3	3	2	2	3	4	4	3	2	3	2	4	4	4	4	3	2	2	2	2	4	3	2	3	4	4	4	3	3	3	3	4	3	3	3	3	4	3	3	4
2	4	2	1	4	5	5	4	4	4	4	4	3	4	4	2	2	2	3	4	4	4	4	4	4	4	3	4	4	3	4	3	3	4	4	4	4	3	5	3	2	1	5	5
1	3	2	3	5	5	5	5	5	5	4	5	4	4	4	3	3	3	3	4	3	4	3	3	4	4	3	3	4	4	4	4	4	4	4	4	4	4	3	3	4	4	4	4
1	3	2	2	2	3	4	3	3	3	5	4	4	3	3	4	4	4	4	4	4	4	4	3	3	3	3	3	5	5	5	5	5	5	3	3	3	3	3	3	3	3	4	4
1	3	2	2	3	3	4	1	3	2	2	2	2	4	1	4	4	4	2	4	2	2	2	3	4	4	4	4	5	5	4	2	2	2	4	4	5	5	3	3	4	4	3	4
2	1	1	2	4	4	3	3	5	5	2	2	2	2	2	3	3	3	5	3	3	3	3	3	5	4	5	5	5	5	5	3	3	3	3	4	5	5	3	4	5	5	5	5
2	1	1	2	3	3	2	4	4	4	3	4	3	2	1	4	4	4	4	3	3	4	3	3	4	3	2	2	3	4	3	3	3	3	4	4	4	4	3	2	4	4	4	4
1	3	1	2	3	3	2	2	3	4	4	3	3	3	3	3	4	4	4	2	3	3	2	3	4	3	3	3	4	4	4	2	2	3	3	2	4	4	2	2	3	2	3	3
2	2	1	3	3	4	2	3	2	3	4	4	1	2	3	3	3	2	2	3	3	3	3	3	3	3	3	3	2	3	3	3	2	3	3	3	2	3	4	2	3	4	3	3
2	2	1	1	3	3	3	3	3	4	3	3	4	3	2	3	3	3	3	3	3	3	3	3	3	3	3	4	3	3	3	3	3	3	3	4	3	4	3	3	3	3	3	4
2	2	1	1	3	3	4	4	5	5	3	4	5	3	3	3	3	2	4	4	3	3	5	5	3	4	3	5	5	5	4	4	4	3	4	5	5	5	4	4	4	3	5	3
2	1	1	1	3	3	3	3	5	5	3	2	3	5	3	5	5	5	3	3	3	3	3	3	3	3	4	3	5	5	4	3	3	3	5	3	4	3	3	3	5	5	5	5
2	1	1	1	4	5	4	4	5	5	5	5	5	5	4	3	4	4	4	4	4	4	4	4	5	4	2	4	5	5	5	5	5	5	4	5	5	5	5	5	4	5	5	5
2	1	1	1	5	5	5	4	5	5	5	2	5	4	4	4	5	3	4	4	3	4	4	4	3	4	4	3	5	3	4	5	4	3	4	4	3	4	3	3	3	5	3	3
2	1	1	2	5	4	4	4	4	3	3	3	3	3	2	3	4	4	4	3	3	4	4	4	4	4	4	4	5	4	4	4	4	4	4	4	4	4	4	4	4	4	5	5
2	1	1	3	4	4	4	4	4	4	4	4	4	4	4	3	3	3	4	5	5	5	5	4	4	4	2	4	5	5	5	5	5	5	5	5	5	5	5	5	4	4	5	5
2	1	1	1	5	5	5	5	5	5	5	5	5	5	5	4	2	4	5	5	5	5	5	1	5	5	5	5	5	5	3	5	5	5	5	5	5	5	5	5	5	5	5	5
1	2	1	1	4	4	5	3	5	2	3	4	3	5	2	3	4	3	3	4	4	5	4	4	4	3	3	4	3	4	3	4	5	5	5	5	4	5	5	5	5	5	5	5
2	5	2	1	3	4	4	3	3	4	4	4	1	4	1	3	2	3	3	3	4	4	4	4	4	4	4	4	2	2	2	2	2	4	4	4	4	4	4	4	3	3	4	4
1	1	1	1	4	4	4	4	4	4	4	4	3	4	3	3	3	3	4	4	3	3	3	3	4	4	5	4	4	4	4	4	4	4	4	4	2	4	2	4	4	3	3	4
2	1	1	1	5	5	4	5	5	5	3	4	4	4	4	4	5	5	5	4	3	4	4	4	5	3	5	4	5	4	3	4	4	5	4	5	4	5	5	4	5	5	5	5
2	2	1	1	4	4	4	3	4	5	2	2	2	1	2	4	4	4	4	4	2	2	2	4	4	3	3	3	3	2	3	3	3	3	4	4	3	4	2	1	1	3	5	5
2	2	1	1	3	3	4	4	4	3	3	3	4	3	3	4	4	4	4	4	3	3	3	3	3	3	3	3	4	4	3	3	3	3	4	4	3	3	3	3	3	3	4	4
2	2	1	1	3	3	3	4	5	4	4	2	4	4	2	4	4	4	4	4	5	4	4	4	4	4	3	4	5	4	4	4	4	4	4	4	4	5	4	4	4	4	2	3
2	3	2	2	1	1	1	1	1	3	1	3	1	5	5	3	3	2	2	3	3	3	3	4	4	4	4	4	2	2	2	2	2	2	1	1	1	1	1	1	1	1	5	5
2	2	2	1	2	2	3	3	2	4	4	4	3	3	2	4	4	4	1	2	2	1	1	2	3	4	2	2	4	4	4	4	4	4	4	4	4	3	3	3	4	4	4	4
2	2	1	1	4	4	4	4	4	4	4	4	4	4	4	4	4	4	4	4	4	4	4	4	4	4	4	5	3	3	3	4	3	4	4	4	4	4	4	4	4	4	3	3
2	2	1	3	4	4	4	3	3	4	4	4	3	3	4	4	3	4	4	4	4	4	4	3	4	3	3	4	5	5	4	4	4	4	4	4	5	4	3	4	4	3	4	4
2	4	2	2	5	5	5	1	3	4	3	3	1	1	1	1	1	1	1	1	1	1	1	1	1	1	1	1	2	2	2	2	1	1	2	2	2	2	1	2	3	3	2	2
2	3	2	2	5	5	5	5	5	5	5	5	5	5	5	4	4	4	4	5	5	5	5	5	5	5	5	5	3	4	4	3	3	4	4	5	4	5	5	5	4	4	4	5
1	3	2	2	3	3	4	3	4	4	3	3	3	3	3	2	2	3	3	3	3	4	3	3	3	3	3	3	4	4	4	3	3	4	3	3	4	3	3	3	3	3	4	4
2	2	1	2	4	4	3	4	4	4	4	3	4	4	2	3	3	3	4	3	2	3	3	3	3	3	2	3	3	3	3	3	3	3	4	4	4	4	3	3	3	3	4	4
2	2	1	2	4	4	5	5	4	4	3	3	3	3	3	4	4	4	4	4	4	4	4	3	3	3	2	2	4	4	4	4	4	4	3	4	4	4	4	4	3	4	4	4
2	4	2	1	5	5	5	5	5	5	5	5	5	5	5	5	5	5	5	5	5	5	5	5	5	5	5	5	5	5	5	5	5	5	5	5	5	5	5	3	3	3	5	5
1	2	1	2	3	3	4	3	4	4	3	3	2	2	2	4	4	4	4	3	3	3	3	3	3	3	3	3	4	4	4	4	4	4	5	4	5	5	5	5	5	5	5	5
1	2	1	2	4	4	4	4	4	4	4	4	3	3	3	5	5	4	4	4	4	4	4	4	4	4	4	4	5	5	5	5	5	5	5	5	4	5	5	4	3	3	4	4
1	2	1	2	5	4	5	3	5	4	3	3	5	4	2	4	4	4	3	5	4	4	3	5	5	3	5	4	5	5	5	5	5	5	4	4	3	5	3	2	2	3	5	4
1	2	1	2	5	4	4	4	4	4	4	3	5	4	4	3	3	3	3	4	4	4	4	5	5	4	5	4	4	4	5	4	5	4	5	5	5	5	5	5	4	2	3	3
1	2	1	2	3	4	4	4	5	5	4	4	3	3	3	5	4	4	4	5	5	4	3	3	3	4	4	3	3	4	4	4	4	4	3	4	4	5	3	3	5	3	5	5
1	2	1	2	5	4	4	5	4	5	4	4	5	4	5	5	4	5	5	5	5	5	4	5	5	4	4	4	5	4	5	5	4	5	5	4	5	5	5	5	5	4	5	5
2	2	1	2	4	3	4	3	4	3	4	3	4	3	4	4	3	4	4	4	4	5	3	5	4	4	3	5	3	4	4	4	3	5	4	4	4	4	4	3	4	5	5	3
2	2	1	2	5	3	3	5	4	5	4	5	5	5	4	4	3	4	5	5	5	4	5	5	4	5	4	4	5	5	4	5	4	5	5	5	5	4	4	3	3	5	5	4
2	2	1	2	5	5	4	4	4	4	5	5	5	5	4	4	5	4	3	5	4	4	3	3	4	5	5	4	4	5	4	5	4	4	4	5	5	5	4	4	5	4	4	3
1	1	1	2	1	1	2	1	1	1	1	1	2	2	1	1	1	1	3	1	1	1	1	1	3	2	2	1	1	1	1	1	1	1	2	2	1	1	1	1	3	2	1	1
1	1	1	2	3	2	2	2	4	4	4	4	2	2	2	4	4	4	3	3	2	2	2	3	2	2	3	3	4	4	4	3	3	3	2	4	4	4	4	3	3	2	3	3
2	2	2	2	4	4	4	5	5	5	5	5	4	4	5	2	2	3	3	5	5	4	4	5	5	4	4	5	5	5	5	5	5	4	5	4	4	3	2	3	3	3	3	3
1	2	2	2	3	4	4	4	4	4	4	4	4	4	4	4	4	4	4	4	5	5	5	5	5	5	5	5	5	5	4	4	4	4	4	4	5	4	5	5	5	5	5	5
1	2	1	2	3	3	4	4	3	4	3	4	3	4	4	4	4	4	4	4	5	5	5	5	4	5	5	5	4	4	4	5	4	4	4	5	5	5	4	5	5	5	5	5
2	2	2	2	5	4	4	4	4	3	4	4	4	2	3	3	3	3	4	4	4	4	4	4	4	4	2	4	5	5	5	4	4	4	4	4	4	5	4	3	3	3	5	5
2	2	1	3	5	5	5	5	5	5	5	5	5	5	5	5	5	5	5	5	5	5	5	5	5	5	5	5	5	5	5	5	5	5	5	5	5	5	5	5	5	5	5	5
2	2	1	3	5	5	5	3	5	5	5	5	5	5	3	5	5	5	5	5	5	5	5	5	5	5	5	5	5	5	5	5	5	5	5	5	5	5	5	5	5	5	5	5
1	2	1	2	3	5	5	5	5	5	4	5	5	5	5	5	4	4	5	5	4	5	5	4	4	5	5	5	5	5	5	5	5	5	5	4	5	5	4	5	4	5	5	5
1	2	1	2	3	4	4	4	4	4	4	4	4	4	4	4	4	4	4	4	4	4	4	4	4	4	4	4	4	4	4	4	4	4	4	4	4	4	4	4	4	4	4	4
1	1	1	2	5	5	4	5	3	3	2	4	3	5	4	4	5	5	4	4	4	4	4	5	4	3	5	5	4	5	4	5	4	4	3	3	3	4	3	1	2	1	3	4
2	2	1	2	4	4	5	5	4	5	5	4	5	5	4	5	5	5	5	5	5	5	5	3	4	4	3	4	5	5	5	5	5	5	5	5	4	4	4	5	5	4	5	5
1	2	2	2	5	5	5	5	5	5	5	5	5	5	5	5	5	5	5	5	5	5	5	5	5	5	5	5	5	5	5	5	5	5	5	5	5	5	5	5	5	5	5	5
2	2	1	2	5	4	5	5	4	4	4	4	4	4	4	4	4	4	4	5	5	5	5	4	4	4	4	4	3	4	5	5	5	4	4	4	4	5	5	5	4	4	5	5
2	2	1	2	4	4	4	4	5	4	5	5	4	4	4	3	4	3	4	4	2	2	2	2	3	2	3	2	3	3	2	4	4	4	3	5	4	3	3	3	5	4	4	4
2	2	1	3	5	5	4	3	4	4	3	3	4	4	3	4	4	4	4	4	4	3	3	4	4	4	4	4	4	4	4	4	4	4	4	4	4	4	4	3	5	5	4	4
2	2	1	3	5	5	4	4	4	5	4	3	5	5	3	4	5	5	5	4	3	3	2	4	3	2	4	3	4	3	3	3	3	3	4	4	5	5	5	4	3	3	4	4
1	2	1	2	3	3	3	4	3	3	3	3	4	4	2	3	4	4	3	3	3	3	3	3	3	3	3	3	4	4	3	3	3	4	3	3	4	3	4	3	3	3	4	4
1	2	1	2	4	4	4	4	5	4	3	3	5	4	4	4	4	4	5	5	5	5	4	4	5	4	4	4	5	5	4	4	4	4	4	4	5	5	5	4	4	4	4	4
2	2	1	2	3	3	3	3	4	4	4	4	4	3	3	4	4	4	4	3	3	4	4	3	4	4	4	4	4	4	4	4	4	4	3	4	4	4	4	4	4	4	4	4
1	2	1	2	3	3	3	4	4	5	3	3	4	4	3	4	4	4	3	3	2	4	3	3	3	3	3	2	3	4	4	4	4	4	4	4	4	4	4	4	4	4	4	5
2	2	2	2	4	4	4	4	4	4	4	4	4	5	5	4	4	4	5	4	4	4	5	5	5	4	4	4	4	4	5	4	4	5	5	4	5	4	5	3	4	5	4	4
2	2	1	1	4	4	3	4	3	3	4	4	3	3	4	4	4	3	4	4	4	4	3	4	4	3	4	3	4	3	3	4	4	4	4	3	4	4	3	4	3	4	3	3
1	1	1	3	5	4	4	5	5	5	5	4	4	4	4	5	5	5	5	3	4	3	4	3	5	4	3	4	3	5	4	5	4	5	3	5	4	4	5	4	4	5	5	4
2	1	1	2	4	4	4	4	4	4	4	4	4	4	4	3	4	4	4	3	3	3	3	4	4	4	4	4	4	4	4	4	4	4	4	4	4	4	4	4	4	4	4	4
1	2	1	3	4	5	5	4	4	4	4	4	5	4	5	3	4	4	4	5	4	4	5	5	5	5	4	4	2	2	3	4	4	4	4	4	4	4	4	4	5	4	5	4
2	3	1	3	4	4	4	3	5	5	5	4	4	4	4	5	5	5	5	4	4	4	4	4	4	4	4	4	5	5	5	5	5	5	4	4	4	4	4	4	5	5	5	5
2	2	1	3	5	5	4	4	5	5	5	5	5	5	3	3	5	5	5	4	4	5	5	5	3	3	3	3	5	5	5	5	5	5	4	5	5	5	5	2	5	5	5	5
2	2	1	3	4	4	4	4	4	5	5	4	4	4	4	4	4	4	5	5	5	5	4	5	5	5	5	5	5	5	5	5	5	5	5	5	5	4	4	4	4	4	5	5
1	3	1	3	4	4	3	3	3	5	4	3	3	3	3	4	4	4	4	4	4	3	3	3	3	3	3	3	4	4	4	4	4	4	4	4	4	4	4	4	3	3	5	5
2	3	1	2	5	5	5	5	4	4	4	5	4	4	4	4	4	4	5	4	5	4	4	4	5	4	4	4	4	4	4	5	4	4	4	4	4	4	4	5	4	4	4	4
2	1	1	2	5	4	4	4	5	4	5	5	4	5	4	4	4	3	4	2	3	3	3	5	3	4	3	4	5	5	5	5	4	4	4	4	4	4	4	4	4	4	4	4
2	3	2	1	4	4	4	4	4	4	3	4	4	4	4	4	3	3	4	4	5	5	5	5	4	5	4	5	4	4	5	4	4	4	4	5	4	5	4	4	4	4	4	4
2	4	2	3	4	5	5	5	3	3	3	3	4	4	4	4	4	4	4	4	4	4	4	4	4	4	3	4	5	5	5	5	5	5	4	4	5	5	4	4	4	4	5	5
2	2	1	1	3	2	2	4	3	4	3	3	2	4	5	2	3	3	4	4	5	4	4	3	3	3	2	4	5	5	5	5	5	5	5	4	3	3	3	3	3	3	4	4
2	2	1	1	4	4	4	4	4	4	4	4	4	4	4	2	4	4	4	4	4	4	4	4	4	4	4	4	4	4	4	4	4	4	4	4	4	5	5	5	2	2	4	4
2	2	1	1	4	5	5	4	4	3	5	4	4	3	4	3	5	2	4	3	5	5	1	3	3	5	2	4	5	4	5	5	1	4	5	4	3	5	3	4	5	4	5	3
2	2	2	2	4	4	4	4	4	4	4	4	4	4	4	4	4	4	4	4	4	4	4	4	4	4	4	4	4	4	4	4	4	4	4	4	4	4	4	4	4	4	4	4
2	2	1	2	5	5	5	5	5	5	4	4	4	4	5	5	4	4	4	4	4	4	4	5	5	5	5	5	4	4	4	5	5	5	3	4	4	4	4	4	4	4	3	3
2	2	1	2	4	4	3	4	4	4	3	3	3	4	3	3	3	4	4	4	4	4	4	3	3	3	4	4	4	4	4	3	4	3	3	4	3	4	3	3	3	3	4	4
2	2	1	1	3	3	2	4	4	5	2	3	2	3	3	2	3	2	4	3	4	3	3	3	3	4	4	4	4	5	3	3	4	3	4	4	4	3	3	2	2	3	3	3
2	2	1	1	5	5	5	5	5	5	5	5	5	5	5	4	4	4	4	5	5	5	5	4	4	4	4	4	5	4	4	4	5	4	4	5	5	4	4	4	4	4	4	4
2	2	1	2	4	4	3	4	4	4	4	4	3	3	3	5	5	5	5	3	3	3	3	4	4	4	4	4	5	5	5	3	3	3	5	4	5	5	3	3	5	5	5	5
1	2	1	2	3	3	3	4	3	3	2	2	3	2	2	4	4	4	3	3	2	3	2	2	3	2	2	2	4	3	4	3	2	3	4	3	3	3	2	2	4	2	4	4
1	2	2	2	3	5	5	4	3	4	2	4	4	4	4	5	3	4	5	5	5	3	5	4	5	4	4	4	5	3	5	3	4	3	2	3	2	3	2	2	5	4	5	5
1	3	2	2	3	4	5	3	5	4	4	4	4	2	2	5	4	3	3	5	4	3	4	4	2	1	3	4	5	5	5	5	5	4	5	5	5	4	4	4	4	3	3	4
1	2	2	2	4	4	4	2	5	3	5	3	4	4	2	5	3	5	3	4	4	4	3	3	3	3	4	3	3	2	4	5	3	3	3	2	3	3	5	2	3	2	3	2
1	4	2	2	4	5	4	3	4	4	3	4	4	5	4	5	4	4	3	4	4	5	3	4	4	3	3	4	4	5	4	3	3	3	4	5	4	4	5	5	5	4	3	3
2	1	1	2	4	4	4	4	5	4	3	2	2	2	3	4	5	5	4	3	3	3	4	3	4	3	4	3	4	5	4	3	4	3	4	3	4	4	4	5	4	2	4	3
1	3	1	2	4	5	4	3	4	5	5	4	5	4	2	4	3	4	4	5	3	1	1	3	3	3	3	1	4	1	3	4	3	3	4	5	5	3	3	3	5	5	5	4
2	3	2	2	3	3	3	4	4	3	3	3	4	4	4	4	4	5	5	4	4	4	4	4	4	4	4	5	5	5	5	5	5	5	5	4	4	4	4	4	4	4	4	4
1	2	1	2	4	4	5	4	4	4	4	4	5	4	5	5	5	4	4	5	4	5	5	5	4	4	4	5	5	4	5	5	4	5	5	5	4	4	4	5	5	5	4	4
2	2	1	2	3	4	5	3	5	5	3	3	4	5	3	3	3	4	4	4	3	3	3	4	3	4	3	4	4	4	4	5	5	5	4	4	4	3	2	4	4	3	4	5
2	4	2	2	5	5	5	5	5	5	4	4	5	3	2	4	4	5	4	5	5	5	5	4	5	4	5	5	5	5	3	4	4	4	5	5	4	5	3	1	1	4	5	5
2	2	1	2	4	4	5	5	5	5	3	4	4	4	4	4	4	4	4	4	4	4	4	4	4	4	4	4	4	4	4	4	4	4	4	4	4	4	4	4	4	4	4	4
2	2	1	2	5	5	5	5	5	5	3	3	5	5	3	5	5	5	5	3	4	3	4	4	5	5	5	5	5	5	5	5	5	5	5	5	3	5	5	5	3	3	5	5
1	2	1	3	4	4	4	4	5	4	3	3	3	2	2	4	5	5	4	3	3	3	3	3	4	3	4	3	4	4	4	3	3	3	3	3	4	5	3	3	4	4	5	5
2	2	1	3	3	3	4	4	2	2	2	2	3	3	2	2	4	4	4	3	4	4	3	3	3	4	3	3	4	4	3	3	3	3	4	3	3	5	3	3	4	2	3	3
1	2	1	2	4	4	4	4	4	4	4	4	4	4	4	4	4	4	4	4	4	4	4	4	4	4	4	4	4	4	4	4	4	4	4	4	4	4	4	4	4	4	4	4
1	2	1	1	5	4	4	4	3	4	5	4	3	4	2	3	4	4	5	5	4	5	5	5	5	4	2	4	5	5	5	4	4	4	4	5	4	4	3	4	5	4	5	4
2	3	1	1	5	5	4	5	5	5	4	5	5	5	4	4	5	5	5	5	5	5	5	5	5	5	5	5	5	5	4	5	5	5	5	5	5	5	5	5	5	5	5	5
2	3	1	2	4	3	4	5	5	5	5	5	4	3	4	2	2	2	2	4	4	4	4	4	3	3	3	3	3	3	3	3	3	3	3	3	3	3	3	3	3	4	4	4
2	2	1	2	5	4	4	5	5	4	4	4	4	4	4	4	4	4	5	4	4	4	4	4	4	4	5	4	5	5	5	4	4	4	4	4	3	3	3	4	4	4	5	5
2	1	1	3	4	3	4	3	3	3	2	2	2	3	2	3	3	3	3	4	3	3	3	2	3	3	3	3	4	3	3	4	3	4	3	4	3	3	3	3	3	3	3	3
2	2	1	1	4	4	4	2	4	4	4	4	2	4	1	2	2	4	2	2	2	1	1	2	2	2	3	2	5	5	5	5	5	5	4	4	4	5	4	2	4	4	5	5
2	1	1	3	4	4	4	5	4	4	5	5	3	3	3	3	4	4	3	4	4	3	4	4	4	4	4	4	5	5	5	5	5	5	3	3	4	3	4	3	4	4	4	4
2	1	1	3	4	4	4	4	4	3	3	3	3	3	3	3	4	3	4	4	4	5	4	4	4	3	4	4	4	4	3	4	5	5	4	4	4	5	4	3	3	3	3	3
2	2	1	3	5	5	4	4	4	4	3	3	3	4	3	3	3	3	2	3	3	3	3	3	4	5	4	4	5	5	4	4	4	4	5	4	4	5	3	4	5	5	5	5
2	2	1	2	3	4	4	5	4	4	5	5	5	5	4	4	4	2	2	4	4	4	4	2	2	2	2	2	5	5	5	4	4	4	5	5	5	2	5	5	2	2	5	3
2	2	1	3	4	4	4	4	3	4	4	4	4	4	4	4	4	4	4	4	4	4	4	4	4	4	4	4	5	5	5	5	5	5	5	4	4	4	3	4	4	4	4	4
2	2	1	2	4	3	4	3	4	4	4	3	3	4	3	4	4	4	4	4	4	4	4	4	4	4	4	4	4	4	4	4	4	4	4	4	4	4	4	3	4	4	4	4
1	1	1	1	2	3	1	2	3	4	2	1	2	2	2	2	2	2	2	2	2	3	3	2	3	3	2	1	3	3	1	3	2	4	2	2	3	2	3	3	3	3	2	2
2	2	1	2	4	4	4	3	5	5	3	4	4	5	4	5	4	5	5	5	5	5	4	5	4	4	5	3	5	5	3	4	4	4	5	5	5	4	3	3	4	3	5	4
1	5	2	3	5	5	5	3	4	4	4	4	4	4	3	2	3	3	3	3	3	3	3	4	4	4	5	3	3	3	3	3	3	3	3	3	3	4	3	2	3	3	3	3
1	5	2	1	2	2	2	2	5	5	4	4	4	4	3	4	4	4	3	4	3	3	4	3	4	3	3	3	5	4	4	3	3	3	3	4	4	4	4	3	3	4	5	5
1	2	1	2	5	4	4	4	4	4	4	4	5	5	4	3	4	4	4	4	3	5	5	5	4	4	3	3	4	4	4	4	4	4	5	5	3	4	4	4	5	4	4	5
1	5	2	3	3	3	2	2	5	4	3	4	3	3	3	3	3	2	3	3	3	3	3	3	3	3	3	3	3	3	3	3	3	3	3	4	4	3	3	4	3	3	4	4
1	5	2	3	4	4	4	3	4	4	4	3	3	4	4	4	4	4	3	4	4	3	3	3	3	3	2	2	4	4	4	3	3	3	4	4	4	4	4	4	4	4	4	4
1	1	1	2	3	4	3	4	4	4	4	4	4	4	4	4	4	4	4	4	4	4	4	3	4	4	3	4	4	4	4	4	4	4	4	4	4	5	3	3	4	4	5	5
2	2	1	2	3	4	4	4	4	3	3	3	3	3	3	4	4	4	4	4	4	4	4	4	4	4	4	4	4	4	3	4	4	4	4	4	4	4	4	4	4	4	4	4
2	2	1	2	4	5	5	5	5	5	5	5	5	5	3	3	3	4	5	4	5	5	5	5	5	5	4	4	5	5	5	5	5	5	4	4	5	5	5	5	5	3	4	4
2	3	1	1	4	4	4	3	3	4	5	4	3	3	2	4	4	4	5	4	3	3	4	4	3	4	4	4	4	4	5	5	5	5	4	4	5	5	5	3	4	5	5	5
2	2	1	3	5	5	5	5	5	5	5	5	5	5	5	5	5	5	5	5	5	5	5	5	5	5	5	5	5	5	5	5	5	5	5	5	5	5	5	5	5	5	5	5
2	2	1	1	4	4	4	4	4	4	4	4	4	4	4	4	4	4	4	4	4	4	4	4	4	4	4	4	4	4	4	4	4	4	4	4	4	4	4	4	4	4	4	4
2	2	1	1	4	4	4	4	5	5	4	4	4	4	4	4	4	4	4	4	4	4	4	4	4	4	3	4	4	4	4	4	4	4	4	4	4	4	4	4	4	4	5	4
2	2	1	1	3	3	4	4	4	4	4	4	3	4	4	4	4	4	4	4	4	4	4	4	3	3	3	4	4	4	4	4	4	4	4	3	3	4	4	4	4	4	4	4
2	2	1	1	5	5	5	5	5	5	5	5	5	5	5	5	5	5	5	5	5	5	5	5	5	4	4	4	5	5	5	5	5	5	5	5	5	5	5	5	5	3	5	5
2	2	1	2	4	4	5	5	5	5	5	4	4	5	2	3	5	4	5	4	3	4	4	3	5	4	3	4	5	5	3	4	4	4	3	4	5	5	2	2	3	4	5	5
2	2	1	2	4	4	4	5	4	4	3	3	5	5	3	5	4	4	5	4	4	5	4	4	4	3	4	5	4	4	4	3	3	3	4	4	4	5	4	3	4	3	4	5
2	2	1	2	5	5	5	5	4	4	5	4	3	3	3	5	5	5	5	5	4	4	4	4	3	4	4	4	5	4	4	4	4	4	4	3	4	4	4	3	4	4	4	4
1	4	2	2	2	2	2	3	4	4	4	4	4	4	1	4	4	4	2	4	2	4	4	2	4	3	4	2	4	4	4	2	2	3	2	2	2	4	3	4	4	4	4	4
2	2	1	2	4	4	3	4	4	4	3	2	3	4	4	4	4	4	4	3	4	3	2	3	4	4	2	2	4	4	4	4	4	3	4	4	4	3	4	4	4	4	2	3
2	2	1	2	3	4	4	3	4	4	4	4	3	3	2	4	4	4	3	4	3	4	4	3	4	4	4	4	4	4	4	4	4	4	4	5	4	5	5	4	3	4	3	4
1	2	1	3	4	4	4	4	4	4	4	4	3	3	3	4	4	4	4	4	4	4	4	3	4	3	3	3	4	4	4	4	4	4	4	3	4	4	4	4	4	4	4	4
2	2	1	3	5	5	5	4	4	5	3	4	3	4	5	3	4	4	5	5	5	5	5	4	5	4	4	5	5	5	4	4	4	4	4	5	5	4	4	2	4	3	4	4
2	3	2	1	4	4	4	4	3	4	5	5	5	5	5	3	3	4	4	4	4	5	5	5	5	5	5	5	5	4	5	4	4	5	4	4	5	5	4	4	5	4	4	4
2	3	1	2	3	3	3	3	4	4	4	4	3	3	3	4	4	4	4	3	3	3	3	4	4	4	4	4	4	4	4	3	3	3	4	4	4	4	4	4	3	3	4	4
1	2	1	2	4	4	5	4	5	4	3	4	3	4	3	2	3	4	5	4	3	4	3	3	2	3	2	3	4	4	3	4	4	3	4	4	3	5	3	3	4	4	5	4
1	2	1	2	4	4	4	4	5	5	4	4	4	3	4	4	4	5	3	4	3	4	3	4	3	4	5	4	5	5	4	5	4	5	3	3	4	4	4	5	4	4	4	4
1	2	2	2	4	5	4	4	4	4	4	4	4	4	4	4	4	4	4	4	4	4	4	4	4	4	4	4	4	4	4	4	4	4	4	4	4	4	4	4	4	4	4	4
1	2	1	2	5	5	4	5	4	5	4	5	4	5	4	3	2	3	4	4	4	3	3	3	3	2	3	4	4	3	4	4	4	4	4	4	3	3	4	3	3	3	5	5
1	4	2	2	4	3	2	4	3	4	4	3	4	3	3	2	2	3	4	2	4	2	3	4	3	3	4	4	3	2	3	3	3	3	4	3	4	4	4	3	4	3	4	3
1	2	1	2	4	4	4	4	3	3	3	4	4	3	2	3	2	4	4	2	4	4	4	3	3	3	4	4	5	4	3	4	4	4	4	3	4	5	4	3	3	3	4	4
2	2	1	3	4	4	4	4	4	4	4	4	5	5	3	4	4	4	3	4	4	4	3	3	4	3	3	4	4	4	3	4	3	3	4	4	4	4	3	4	3	3	4	4
2	2	1	3	4	4	4	4	4	4	4	4	4	4	4	4	4	4	4	4	4	4	4	4	4	4	4	4	5	5	5	5	5	5	4	4	4	4	4	3	4	4	4	4
1	1	1	2	4	4	4	4	4	3	3	3	3	3	3	4	4	4	4	3	3	3	3	3	3	3	3	3	5	5	5	5	5	5	3	4	4	4	4	4	2	3	3	3
2	2	1	1	4	4	4	4	4	4	3	3	4	4	3	3	4	4	4	4	5	4	4	4	4	5	4	4	5	4	4	4	5	4	4	4	5	4	5	4	3	3	4	4
1	2	1	2	4	4	4	4	4	3	3	3	3	3	2	3	3	3	3	3	3	3	3	3	3	3	3	3	4	4	4	2	2	2	3	3	3	3	3	3	4	3	4	4
2	2	1	1	4	4	5	4	4	5	4	5	4	5	4	3	3	3	3	3	3	3	3	2	2	2	2	2	3	3	3	3	3	3	2	2	3	4	2	3	1	2	4	3
1	2	1	2	4	3	5	3	3	4	3	4	5	4	5	4	4	4	4	4	4	4	4	4	4	4	4	4	3	4	4	4	4	4	5	5	5	4	4	4	4	3	4	4
2	2	1	1	5	5	4	4	4	5	3	4	5	4	4	3	4	3	4	4	5	5	5	4	4	4	4	5	4	4	4	4	4	4	5	5	5	5	5	5	5	5	5	5
1	1	1	3	4	2	4	5	3	4	3	2	3	2	4	4	3	3	3	3	4	3	4	3	5	3	4	4	4	4	4	4	4	3	4	4	3	4	4	4	3	3	4	4
2	2	1	3	4	4	4	4	4	4	4	4	4	4	4	4	4	4	4	4	3	5	3	4	4	4	4	4	4	5	5	4	3	4	4	4	4	3	5	4	4	4	4	4
1	2	1	2	5	5	5	5	5	5	4	5	5	5	5	4	5	5	5	4	5	5	5	5	5	5	5	5	5	4	4	5	4	4	4	5	5	5	5	5	5	3	4	5
1	2	1	2	5	5	3	3	5	5	5	5	5	5	3	2	2	3	4	4	3	4	4	4	4	4	1	3	3	3	3	3	3	3	3	4	2	5	4	5	4	4	3	3
2	3	2	1	4	4	5	5	4	4	4	4	4	4	4	4	4	4	4	4	4	4	4	2	3	4	2	3	2	4	4	4	4	4	2	4	4	4	4	4	4	4	4	4
1	1	1	1	5	5	4	3	4	3	5	4	4	3	4	3	3	4	4	5	4	5	3	4	5	4	5	3	5	5	4	3	4	5	5	4	3	3	2	4	5	3	4	4
1	2	1	1	5	5	5	5	5	5	5	5	5	5	5	4	4	4	4	4	4	4	4	5	5	4	3	4	5	5	5	5	5	5	5	5	5	5	5	5	5	5	5	5
2	2	1	1	2	4	4	5	4	4	4	5	3	3	3	3	3	4	4	3	4	4	4	4	4	4	3	4	4	5	4	4	4	3	3	4	5	3	5	3	4	5	4	4
1	2	2	2	4	4	4	3	4	4	4	4	4	4	4	4	4	4	4	4	4	4	4	4	4	4	2	4	4	4	4	4	4	4	4	4	4	5	4	4	4	4	4	4
1	3	2	2	5	5	5	5	4	4	4	4	3	3	3	2	2	2	2	3	3	3	3	5	5	5	5	5	2	2	2	2	2	2	4	4	4	4	4	4	3	3	2	2
1	2	2	2	3	4	3	4	3	3	4	3	3	3	3	3	3	4	3	4	3	3	3	3	3	3	4	3	3	4	3	3	4	3	3	4	3	3	3	3	3	3	4	4
1	4	2	2	3	4	4	4	4	4	4	4	4	4	4	4	4	4	4	4	4	4	4	4	4	4	4	4	4	4	4	4	4	4	4	4	4	4	4	4	4	4	4	4
1	4	2	2	5	3	2	4	4	4	4	4	5	3	3	4	4	3	3	4	4	3	4	3	4	4	4	5	4	4	4	3	3	3	4	5	4	4	4	4	5	5	5	5
2	2	1	3	4	4	4	5	4	4	3	3	3	3	3	5	5	5	4	4	4	4	4	4	4	4	3	4	4	4	5	4	4	4	5	5	5	5	4	3	4	4	4	4
2	2	1	1	4	4	3	4	3	3	3	3	3	2	3	4	4	3	3	4	4	4	4	4	4	4	4	4	3	4	4	3	3	4	4	4	4	4	4	4	5	5	4	4
2	1	1	1	4	4	4	4	4	4	4	4	4	4	4	4	4	4	4	4	4	4	4	4	4	4	4	4	4	4	4	4	4	4	4	4	4	4	4	4	4	4	4	4
2	2	1	1	4	4	4	5	5	5	5	5	4	4	4	3	2	2	4	4	4	4	4	5	5	4	4	4	5	5	5	4	4	3	4	4	5	3	4	4	4	5	4	4
1	2	1	1	5	5	5	5	5	5	5	5	4	5	5	4	4	4	4	5	5	5	5	4	4	4	4	4	5	5	5	5	5	5	5	4	5	5	5	5	5	5	4	4
1	3	2	2	3	2	3	2	4	4	3	3	3	4	3	3	4	4	4	4	4	4	3	2	3	3	4	3	4	4	3	3	3	4	3	4	3	5	3	4	4	4	4	4
1	2	2	2	5	5	5	5	5	5	5	5	5	5	4	5	5	5	5	5	5	5	5	5	3	4	3	4	5	5	5	5	5	5	4	4	4	4	5	5	5	5	5	5
1	4	2	2	2	4	4	4	5	5	5	2	5	4	3	5	5	5	5	5	5	5	5	5	3	5	4	4	4	4	4	4	4	4	4	5	5	5	4	5	5	5	5	5
1	2	1	1	4	4	4	3	5	4	4	3	4	5	4	4	4	4	4	4	4	4	4	4	4	4	4	4	4	4	4	4	4	4	4	4	4	3	4	4	3	4	4	5
1	2	1	1	3	2	2	3	2	3	2	4	3	4	4	2	1	1	4	5	4	4	4	4	3	3	2	4	2	1	2	3	2	3	3	4	3	2	3	3	3	2	1	2
1	2	1	2	4	4	4	3	4	4	5	4	3	4	3	4	4	4	5	4	4	4	4	5	4	5	4	4	5	5	4	4	4	5	4	5	4	4	4	4	5	5	4	4
2	3	2	2	4	4	3	3	4	4	5	5	3	4	4	4	5	4	5	4	3	4	4	4	4	4	4	4	5	3	5	4	4	4	4	4	4	5	5	5	3	3	5	5
2	3	1	2	4	4	3	4	4	4	4	4	4	4	4	4	4	4	4	4	3	3	3	3	3	3	3	3	4	4	4	4	4	4	4	3	4	4	4	4	3	3	3	3
2	2	1	2	4	4	4	4	4	4	4	4	4	4	4	4	4	4	4	4	4	4	4	4	4	4	4	4	4	4	4	4	4	4	4	4	4	4	4	4	4	4	4	4
1	3	2	1	5	4	3	3	4	4	4	4	3	3	3	4	4	4	4	4	3	3	3	4	4	4	3	4	4	4	4	4	4	4	4	4	4	4	4	4	4	5	5	5
1	4	2	2	3	3	3	1	1	2	4	1	1	1	1	2	1	4	1	2	1	1	1	1	1	1	5	1	5	5	5	1	1	1	4	4	1	5	3	1	1	5	5	5
2	2	1	2	4	4	4	5	3	4	3	3	5	3	4	2	5	5	4	4	4	4	4	4	3	3	4	4	5	5	3	4	3	3	4	4	4	5	5	4	3	4	4	4
1	2	1	2	4	4	4	5	5	5	2	3	1	1	1	5	5	5	2	3	2	3	3	4	3	4	4	3	5	5	5	3	3	5	1	4	4	5	3	3	4	4	3	3
2	1	1	2	4	4	4	4	4	4	4	4	3	4	3	4	4	4	4	4	4	4	4	3	3	3	4	4	4	4	4	4	4	4	3	3	4	4	4	3	3	3	3	4
